# Supplementary material for: Metabonomic analysis of the joint toxic action of long-term low-level exposure to a mixture of four organophosphate pesticides in rat plasma
Source: Royal Society of Chemistry journal article supplement (doi:10.1039/c4mb00044g), 2014-02-26
Supplement: c4mb00044g1.pdf [file c4mb00044g1.pdf]

**Attached list 1** The water consumption of all rats at different time points

| Groups | Water consumption (mL) |          |          |          |          |          |          |          |          |          |          |          |          |
|--------|------------------------|----------|----------|----------|----------|----------|----------|----------|----------|----------|----------|----------|----------|
|        | W0                     | W1       | W2       | W3       | W4       | W5       | W6       | W7       | W8       | W12      | W16      | W20      | W24      |
| C      | 25.6±2.8               | 31.6±3.7 | 32.4±2.8 | 33.8±2.6 | 37.7±3.5 | 42.4±3.1 | 41.1±2.2 | 40.5±3.7 | 42.0±2.6 | 43.0±2.3 | 40.8±2.9 | 43.0±3.1 | 41.2±2.7 |
| L      | 27.7±2.2               | 30.7±3.5 | 33.4±3.3 | 33.4±3.2 | 39.7±3.3 | 43.7±3.1 | 41.4±3.3 | 42.8±3.5 | 44.7±2.3 | 40.5±2.7 | 41.3±3.4 | 42.4±2.5 | 42.9±3.0 |
| M      | 26.9±3.5               | 28.9±3.8 | 31.0±3.7 | 31.8±3.4 | 38.6±1.9 | 39.9±3.5 | 39.2±2.5 | 39.9±2.5 | 41.1±1.5 | 41.1±3.0 | 40.7±3.5 | 41.2±3.7 | 40.4±2.0 |
| H      | 25.6±2.4               | 28.6±3.9 | 29.8±3.5 | 30.8±2.5 | 36.3±3.2 | 38.9±3.2 | 38.8±2.8 | 38.8±3.2 | 40.0±3.8 | 39.2±3.2 | 39.0±3.1 | 40.4±3.4 | 39.3±3.0 |

C, control group; L, low-dose group; M, middle-dose group; H, high-dose group; w, weeks. Values expressed as mean ± SD. The water consumption was stable after 8 weeks, so it was described briefly.

**Attached list 2** Summary of intensity values of biomarkers detected in positive ESI mode in rats' plasma

| Times (week) | Group s | Peak intensity (mean ± SD, n = 5) |                 |                 |                  |              |              |                 |                          |                   |               |                              |
|--------------|---------|-----------------------------------|-----------------|-----------------|------------------|--------------|--------------|-----------------|--------------------------|-------------------|---------------|------------------------------|
|              |         | Indoleacrylic acid                | C16 sphinganine | C17 sphinganine | Phytosphingosine | LysoPC(15:0) | LysoPC(16:0) | LysoPC(O-18 :0) | LysoPC(P-19:1 (12Z)/0:0) | LysoPC(18:1 (9Z)) | LysoPC (18:0) | LysoPC(20:4(5Z, 8Z,11Z,14Z)) |
| 4w           | C       | 222.3±18.4                        | 25.3±5.7        | 26.7±4.2        | 16.0±4.9         | 15.2±1.1     | 606.3±92.3   | 6.1±1.0         | 639.7±33.4               | 26.3±15.1         | 141.8±29.8    | 500.7±26.6                   |
|              | L       | 212.0±33.7                        | 30.0±5.4        | 22.9±4.0        | 17.5±5.8         | 17.8±1.5     | 684.8±89.6   | 5.4±0.4         | 657.4±74.2               | 31.6±2.8          | 138.7±32.6    | 510.4±19.9                   |
|              | M       | 247.6±23.5                        | 34.0±7.2        | 24.5±4.1        | 18.9±5.5         | 17.3±3.2     | 656.8±101.4  | 5.5±0.7         | 626.3±30.3               | 29.9±3.4          | 144.0±31.5    | 531.6±31.8                   |
|              | H       | 219.6±29.9                        | 30.0±2.2        | 24.1±4.0        | 17.4±0.6         | 17.8±1.9     | 661.9±117.1  | 5.6±1.2         | 628.5±64.1               | 33.8±7.5          | 153.1±34.2    | 546.9±44.9                   |
| 8w           | C       | 236.0±36.1                        | 29.5±4.5        | 25.1±2.2        | 20.8±7.8         | 14.6±4.1     | 746.7±55.7   | 9.2±1.2         | 614.4±52.7               | 35.9±5.8          | 154.4±41.7    | 529.5±44.6                   |
|              | L       | 245.2±22.8                        | 33.7±7.1        | 21.7±3.7        | 18.5±5.7         | 16.7±2.0     | 775.9±34.0   | 14.7±4.0        | 603.4±39                 | 34.9±5.6          | 156.0±25.0    | 540.4±55.3                   |
|              | M       | 215.6±59.8                        | 32.3±9.5        | 21.4±4.9        | 18.8±6.7         | 15.4±2.0     | 689.1±49.6   | 16.4±1.1*       | 611.9±49.6               | 41.8±9.8          | 151.6±16.2    | 608.9±72.1*                  |
|              | H       | 210.0±34.2                        | 24.9±3.9        | 19.4±4.6*       | 18.8±4.3         | 15.2±3.1     | 765.3±80.8   | 18.2±8.8*       | 665±47.4                 | 33.0±4.5          | 184.8±10.9    | 632.4±39.5**                 |
| 12w          | C       | 228.1±32.2                        | 28.8±6.6        | 21.3±6.1        | 16.4±3.8         | 12±2.2       | 636±89.2     | 10.9±2.1        | 480.2±77.5               | 30.8±9.6          | 119.8±27.4    | 512.0±88.8                   |
|              | L       | 200.9±28.1                        | 21.7±6.5        | 14.2±3.2*       | 14.7±2.8         | 14.7±3.2     | 645.5±116.3  | 8.3±1.9*        | 502.6±73.5               | 37.3±6.9          | 134.1±34.1    | 607.5±54.4*                  |
|              | M       | 165.8±40.9*                       | 21.3±4.8        | 15.0±1.5*       | 9.7±3.4**        | 15.0±1.9     | 781.9±51.0** | 8.1±1.9*        | 534.9±76.7               | 39.1±4.5          | 162.1±21.8*   | 622.2±36.7*                  |
|              | H       | 164.6±36.2*                       | 15.8±2.2*       | 15.2±4.8*       | 9.7±2.5**        | 15.8±1.2*    | 834.8±65.4** | 6.9±0.9**       | 649.3±64.7**             | 45.1±7.8**        | 171.7±12.2**  | 615.0±59.8**                 |
| 16w          | C       | 212.4±32.1                        | 29.6±4.3        | 21.1±3.4        | 17.6±4.7         | 13.3±1.0     | 574.1±36.1   | 8.4±1.8         | 479.8±47.1               | 35.5±6.8          | 121.2±16.2    | 500.0±52.7                   |
|              | L       | 169.9±9.3*                        | 21.4±2.5*       | 14.6±2.8*       | 10.8±1.6**       | 17.9±1.4**   | 672.2±26.3** | 13.7±3.8**      | 561.6±20.7*              | 50.1±6.9**        | 151.2±23.1*   | 580.5±30.1*                  |
|              | M       | 180.9±24.8*                       | 20.9±1.9*       | 14.3±1.2*       | 9.1±1.5**        | 18.5±3.5**   | 720.6±49**   | 13.2±2.2**      | 568.8±46.0**             | 50.1±5.2**        | 175.4±15**    | 588.7±29.0**                 |
|              | H       | 179.1±19.0*                       | 17.9±1.4*       | 12.5±7.2**      | 7.3±1.3**        | 19.4±2.7**   | 705.8±66.7** | 15.6±1.2**      | 605.8±55.1**             | 49.2±9.2**        | 168.1±24**    | 605.9±66.2**                 |
| 20w          | C       | 193.4±10.9                        | 28.3±2.9        | 19.6±2.7        | 19.0±2.4         | 12.2±1.2     | 707.1±29.3   | 10.0±2.6        | 395.3±44.5               | 32.9±6.2          | 117.6±9.7     | 539.4±25.2                   |
|              | L       | 160.1±16.3**                      | 22.6±4.8*       | 13.8±1.0*       | 10.7±3.1**       | 18.1±2.7**   | 763.8±24.6** | 15.8±0.9**      | 518.3±40.8**             | 43.9±7.5**        | 161.3±13.6**  | 609.0±47.5*                  |
|              | M       | 157.2±24.5**                      | 22.7±5.6*       | 13.1±3.4*       | 11.8±4.4**       | 19.3±3.5**   | 813.1±31.7** | 15.2±2.6**      | 487.3±61.6**             | 47.6±4.7**        | 154.9±32.9**  | 644.4±52.6**                 |
|              | H       | 148.9±13.4**                      | 20.7±2.5*       | 10.8±6.8**      | 10.6±2.8**       | 19.1±1.3**   | 764.9±28.6** | 18.8±1.6**      | 560.4±76.7**             | 45.8±3.2**        | 155.8±26.9**  | 619.9±40.3**                 |
| 24w          | C       | 200.1±26.2                        | 28.1±5.5        | 21.6±3.2        | 16.4±2.5         | 13.4±3.2     | 558.3±19.6   | 10.0±2.9        | 479.9±60.7               | 32.0±7.7          | 120.0±22.7    | 504.3±38.4                   |
|              | L       | 153.8±20.9**                      | 19.2±2.7*       | 13.9±3.3**      | 9.7±2.5**        | 20.2±1.5**   | 635±32.6**   | 15.7±3.8**      | 595.3±38.4**             | 45.6±7.9**        | 153.7±17.5**  | 602.8±64.9*                  |
|              | M       | 158.8±10.5**                      | 17.1±4.0*       | 13.5±1.2**      | 8.1±2.4**        | 22.2±3.7**   | 697.4±53.2** | 18.0±0.2**      | 610.7±39.4**             | 48.7±5.5**        | 158.9±17.9**  | 648.0±85.0**                 |
|              | H       | 147.0±7.7**                       | 21.2±2.8*       | 14.8±1.5**      | 11.4±3.0**       | 23.8±3.3**   | 690.1±48.6** | 18.5±0.7**      | 617.0±56.2**             | 51.9±8.3**        | 166.5±10.8**  | 631.0±69.0**                 |

Note . C, control group; L, low-dose group; M, middle-dose group; H, high-dose group.

\*Significantly different from control (0 mg/kg/day) rats at p < 0.05 (ANCOVA).

\*\*Significantly different from control (0 mg/kg/day) rats at p < 0.01 (ANCOVA).

**Attached list 3** Summary of intensity values of biomarkers detected in negative ESI mode in rats' plasma

|                 |        | Peak intensity (mean $\pm$ SD, n = 5) |                  |                    |                    |                  |                   |                   |                    |
|-----------------|--------|---------------------------------------|------------------|--------------------|--------------------|------------------|-------------------|-------------------|--------------------|
| Times<br>(week) | Groups | Glutamic acid                         | 4-Pyridoxic acid | Tryptophan         | Arachidonic acid   | Iodotyrosine     | LysoPE(16:0/0:0 ) | Glycocholic Acid  | LysoPC(17:0/0:0 )  |
| 4w              | C      | 9.4 $\pm$ 4.7                         | 17.3 $\pm$ 2.7   | 103.2 $\pm$ 7.4    | 67.6 $\pm$ 22.1    | 21.4 $\pm$ 3.5   | 56.4 $\pm$ 8.4    | 17.7 $\pm$ 3.3    | 177.7 $\pm$ 11.0   |
|                 | L      | 12.5 $\pm$ 1.7                        | 13.2 $\pm$ 3.0   | 105.0 $\pm$ 18.3   | 56.5 $\pm$ 25.7    | 18.4 $\pm$ 4.0   | 52.3 $\pm$ 7.2    | 18.1 $\pm$ 3.9    | 167.3 $\pm$ 15.8   |
|                 | M      | 12.5 $\pm$ 1.5                        | 15.1 $\pm$ 1.8   | 115.6 $\pm$ 4.5    | 64.2 $\pm$ 14.6    | 17.0 $\pm$ 0.9   | 54.7 $\pm$ 9.2    | 20.0 $\pm$ 5.8    | 184.8 $\pm$ 24.3   |
|                 | H      | 12.2 $\pm$ 2.5                        | 14.0 $\pm$ 3.7   | 104.5 $\pm$ 17.1   | 77.3 $\pm$ 34.0    | 18.5 $\pm$ 3.0   | 59.8 $\pm$ 9.4    | 20.5 $\pm$ 4.0    | 171.9 $\pm$ 45.9   |
| 8w              | C      | 9.5 $\pm$ 2.5                         | 14.3 $\pm$ 3.4   | 156 $\pm$ 29.6     | 68.1 $\pm$ 9.6     | 21.5 $\pm$ 1.8   | 41.5 $\pm$ 6.2    | 23.6 $\pm$ 4.6    | 191.3 $\pm$ 27.9   |
|                 | L      | 10.2 $\pm$ 3.4                        | 16.4 $\pm$ 4.2   | 150.3 $\pm$ 31.7   | 77.6 $\pm$ 24.3    | 18.4 $\pm$ 6.8   | 53.4 $\pm$ 15.3   | 28.4 $\pm$ 8.6    | 180.7 $\pm$ 15.9   |
|                 | M      | 11.3 $\pm$ 0.8                        | 19.8 $\pm$ 4.1*  | 143.3 $\pm$ 48.1   | 91.1 $\pm$ 31.2    | 21.9 $\pm$ 1.3   | 54.1 $\pm$ 10.3   | 26.8 $\pm$ 7.1    | 195.9 $\pm$ 44.6   |
|                 | H      | 13.0 $\pm$ 0.6*                       | 20.7 $\pm$ 4.3*  | 115.2 $\pm$ 16.1   | 82.6 $\pm$ 12.8    | 20.4 $\pm$ 1.3   | 59.3 $\pm$ 13.8*  | 33.5 $\pm$ 3.3*   | 174.3 $\pm$ 20.3   |
| 12w             | C      | 10.4 $\pm$ 2.1                        | 12.3 $\pm$ 4.2   | 162.9 $\pm$ 25.0   | 43.3 $\pm$ 20.1    | 28.7 $\pm$ 5.3   | 42.7 $\pm$ 14.3   | 17.0 $\pm$ 8.4    | 179.4 $\pm$ 23.0   |
|                 | L      | 10.4 $\pm$ 0.7                        | 18.9 $\pm$ 3.3*  | 155.0 $\pm$ 41.6   | 66.5 $\pm$ 36.8    | 26.6 $\pm$ 3.8   | 46.8 $\pm$ 15.0   | 26.8 $\pm$ 13.2   | 189.6 $\pm$ 37.4   |
|                 | M      | 14.4 $\pm$ 3.8*                       | 19.1 $\pm$ 4.7*  | 86.6 $\pm$ 12.0**  | 76.2 $\pm$ 11.7    | 21.7 $\pm$ 2.8*  | 62.1 $\pm$ 5.4*   | 37.6 $\pm$ 8.2**  | 216.3 $\pm$ 32.1   |
|                 | H      | 17.2 $\pm$ 3.1**                      | 20.1 $\pm$ 4.7*  | 94.4 $\pm$ 22.9**  | 91.3 $\pm$ 46.8*   | 21.0 $\pm$ 2.5** | 59.5 $\pm$ 10.2*  | 36.8 $\pm$ 8.9**  | 256.9 $\pm$ 30.8** |
| 16w             | C      | 11.4 $\pm$ 2.6                        | 13.9 $\pm$ 2.4   | 140.1 $\pm$ 8.8    | 42.4 $\pm$ 2.8     | 33.2 $\pm$ 3.1   | 40.8 $\pm$ 5.0    | 15.4 $\pm$ 10.7   | 176.6 $\pm$ 17.6   |
|                 | L      | 19.6 $\pm$ 3.3*                       | 17.9 $\pm$ 3.1*  | 108.3 $\pm$ 14.8** | 58.6 $\pm$ 8.4     | 24 $\pm$ 4.8**   | 58.7 $\pm$ 14.1*  | 34.5 $\pm$ 17.7*  | 185.7 $\pm$ 37.1   |
|                 | M      | 24.8 $\pm$ 6.4**                      | 19.4 $\pm$ 3.6** | 101.0 $\pm$ 13.7** | 80.0 $\pm$ 18.1**  | 22.3 $\pm$ 3.7** | 57.4 $\pm$ 10.5*  | 45.2 $\pm$ 14.5** | 218.0 $\pm$ 24.6*  |
|                 | H      | 25 $\pm$ 4.8**                        | 22.2 $\pm$ 2.0** | 106.3 $\pm$ 22.3** | 92.8 $\pm$ 14.7**  | 20.1 $\pm$ 3.0** | 63.9 $\pm$ 9.4**  | 35.9 $\pm$ 7.8**  | 242.5 $\pm$ 27.7** |
| 20w             | C      | 12.9 $\pm$ 3.8                        | 12.7 $\pm$ 3.3   | 152.0 $\pm$ 28.5   | 38.7 $\pm$ 12.0    | 32.7 $\pm$ 5.0   | 37.7 $\pm$ 2.0    | 21.5 $\pm$ 8.1    | 156.2 $\pm$ 30.1   |
|                 | L      | 26.4 $\pm$ 4.9**                      | 19.6 $\pm$ 2.8** | 86.2 $\pm$ 13.5**  | 59.8 $\pm$ 10.4*   | 24.2 $\pm$ 0.8** | 51.3 $\pm$ 10.1*  | 36.1 $\pm$ 3.3**  | 225.9 $\pm$ 39.8** |
|                 | M      | 24.7 $\pm$ 8.1**                      | 19.4 $\pm$ 3.5** | 100.2 $\pm$ 12.5** | 68.9 $\pm$ 15.6**  | 23.5 $\pm$ 2.0** | 59.1 $\pm$ 8.2**  | 35.4 $\pm$ 8**    | 227.4 $\pm$ 41.4** |
|                 | H      | 29.3 $\pm$ 4.6**                      | 20.8 $\pm$ 4.3** | 109.5 $\pm$ 10.9** | 103.9 $\pm$ 18.7** | 19.3 $\pm$ 3.4** | 63.9 $\pm$ 9.1**  | 37.3 $\pm$ 8.9**  | 238.5 $\pm$ 20.9** |
| 24w             | C      | 12.3 $\pm$ 1.8                        | 14.5 $\pm$ 2.4   | 143.6 $\pm$ 6.1    | 53.1 $\pm$ 10.7    | 34.5 $\pm$ 5.0   | 34.9 $\pm$ 9.1    | 23.4 $\pm$ 4.0    | 163.7 $\pm$ 20.4   |
|                 | L      | 25.2 $\pm$ 5.1**                      | 20 $\pm$ 3.6**   | 107.9 $\pm$ 12.4** | 93.6 $\pm$ 14.8**  | 23.4 $\pm$ 2.9** | 51.1 $\pm$ 9.2*   | 41.2 $\pm$ 14**   | 222.6 $\pm$ 34.6** |
|                 | M      | 20.3 $\pm$ 1.5**                      | 22.6 $\pm$ 3.8** | 84.0 $\pm$ 8.9**   | 80.7 $\pm$ 13.2**  | 25.0 $\pm$ 3.1** | 57.3 $\pm$ 9.4**  | 42.3 $\pm$ 1.1**  | 234.8 $\pm$ 15.5** |
|                 | H      | 27.6 $\pm$ 5.1**                      | 24.7 $\pm$ 4.5** | 99.5 $\pm$ 7.5**   | 90.2 $\pm$ 14.9**  | 21.1 $\pm$ 2.9** | 58.3 $\pm$ 15.3** | 47.0 $\pm$ 8.6**  | 263.1 $\pm$ 26.2** |

Note . C, control group; L, low-dose group; M, middle-dose group; H, high-dose group.

\*Significantly different from control (0 mg/kg/day) rats at  $p < 0.05$  (ANCOVA).

\*\*Significantly different from control (0 mg/kg/day) rats at  $p < 0.01$  (ANCOVA).
